# Supplementary material for: Self-standing aptamers by an artificial defect-rich matrix
Source: Royal Society of Chemistry journal article supplement (doi:10.1039/c7nr07381j), 2018-01-01
Supplement: c7nr07381j1.pdf [file c7nr07381j1.pdf]

*Supporting Information*

# Self-Standing Aptamers by Artificial Defect-Rich Matrix

*Chong-You Chen,<sup>a</sup> Chang-Ming Wang,<sup>a</sup> Pai-Shan Chen,<sup>b</sup> and Wei-Ssu Liao<sup>a,\*</sup>*

<sup>a</sup> Department of Chemistry, National Taiwan University, Taipei 10617, Taiwan

<sup>b</sup> Department and Graduate Institute of Forensic Medicine, National Taiwan University, Taipei  
10002, Taiwan

\*To whom correspondence should be addressed: [wsliaochem@ntu.edu.tw](mailto:wsliaochem@ntu.edu.tw)

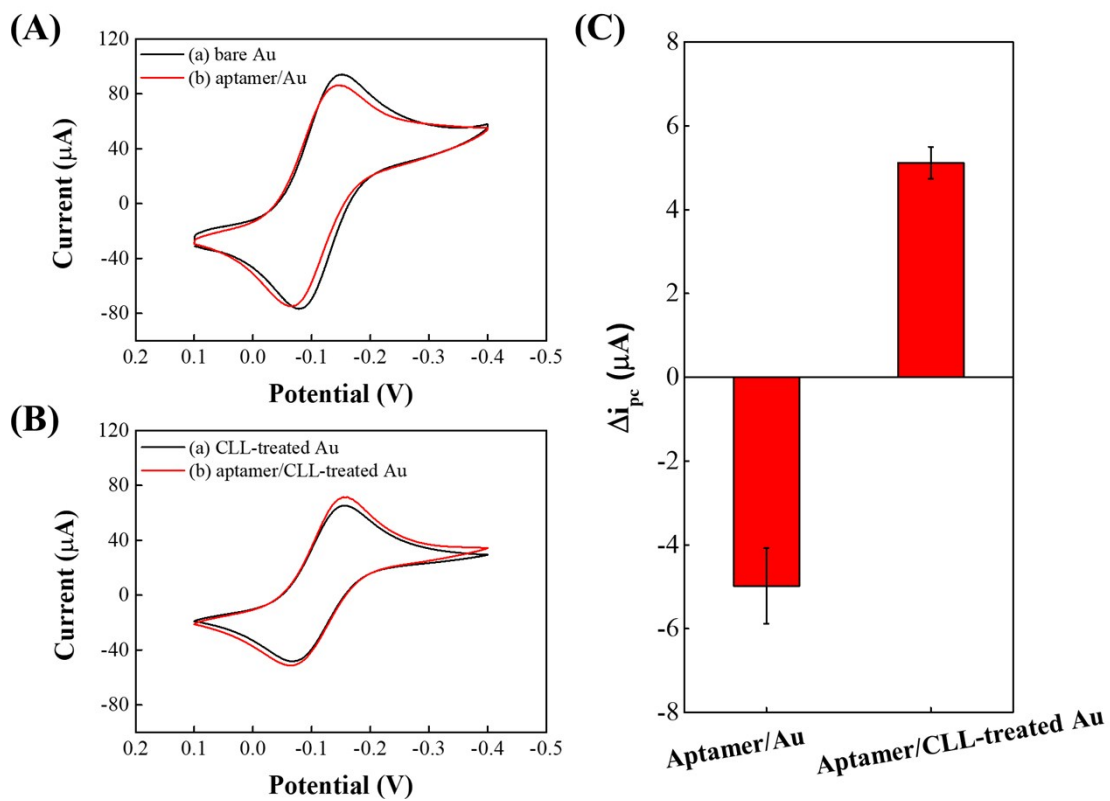

**Figure S1.** Cyclic voltammograms of 1 mM  $[\text{Ru}(\text{NH}_3)_6]^{3+}$  on different surfaces. (A) Bare Au (curve a) and aptamer-modified Au (curve b). (B) CLL-treated Au (curve a) and aptamer-modified CLL-treated Au (curve b). These measurements were performed in 25 mM TRIS buffer at pH 7.4 with a scan rate of 100 mV/s. (C) The 1 mM  $[\text{Ru}(\text{NH}_3)_6]^{3+}$  CV response change upon aptamer-modification of bare Au (A) and CLL-treated Au (B) surfaces. (N = 3) The error bars indicate the standard deviation.

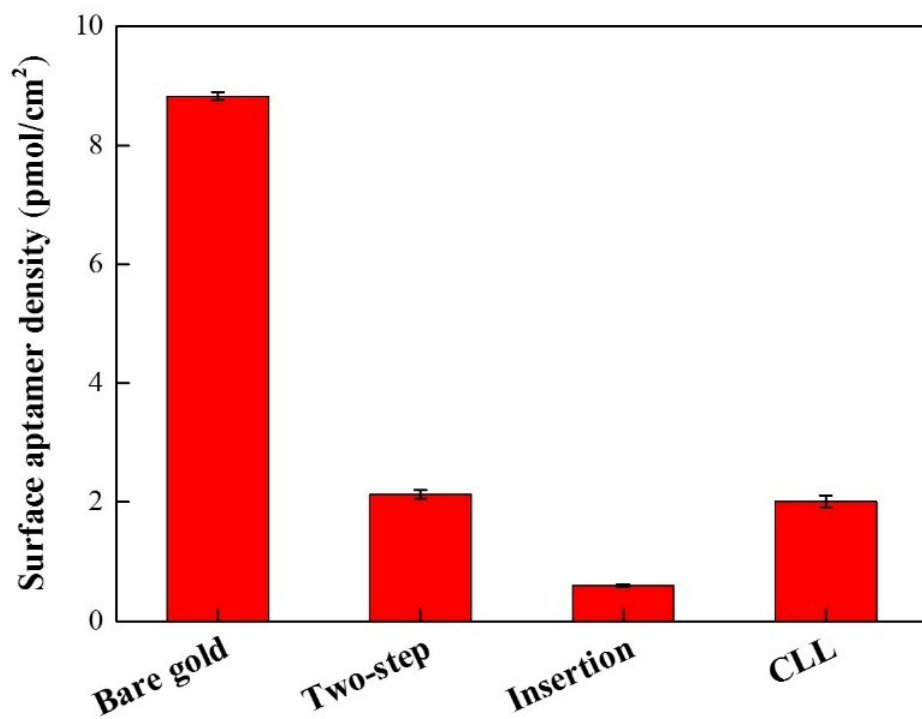

**Figure S2.** Surface aptamer density histograms from substrates fabricated by different processes. Each data point is obtained from the average fluorescence intensity of three samples (N = 3). The error bars indicate the standard deviation.

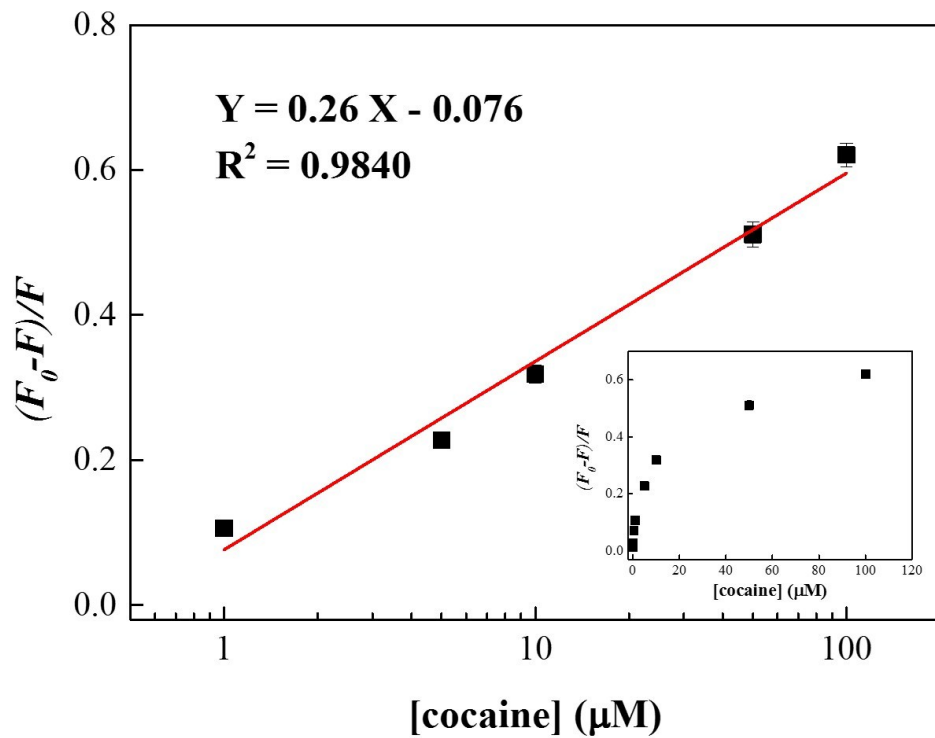

**Figure S3.** Linear correlation curve derived from  $(F_0 - F)/F$  against the logarithm of cocaine concentration and (inset) the cocaine concentration. Each data point is obtained from the average fluorescence signal of individual squares ( $N = 4$ ). The error bars indicate the standard deviation.

### Calculations of dissociation constants ( $K_d$ )

According to literature reports,<sup>1-4</sup> aptamer probe 3 can hybridize with cocaine with a molar ratio of 1:1. Therefore, the  $K_d$  can be defined as the formula given in equation (1):

$$K_d = \frac{[aptamer] \times [cocaine]}{[aptamer/cocaine]} \quad (1)$$

where  $[aptamer]$ ,  $[cocaine]$ , and  $[aptamer/cocaine]$  are the concentrations of unhybridized aptamer, unhybridized cocaine, and hybridized cocaine/aptamer on the gold surface, respectively. Based on 1:1 of aptamer/cocaine binding stoichiometry, when  $[aptamer] = [aptamer/cocaine]$ , equation (1) is simplified to  $K_d = [cocaine]$ . In this case, when cocaine leads half the total of FAM-labeled aptamer to fluorescence quenching or half-maximal fluorescence image contrast change,  $K_d$  is equal to cocaine concentration.

As shown in Figure S1, the linear fitted equation of correlation is:

$$Y = 0.26 X - 0.076 \quad (2)$$

in which  $Y$  and  $X$  respectively represent the value of  $(F_0 - F)/F$  and the logarithm of cocaine concentration ( $\mu\text{M}$ ). (Note:  $F_0$  and  $F$  represent corresponding relative fluorescence intensities without and with targets, respectively.) The maximum value of  $(F_0 - F)/F$  ( $Y_{\max}$ ) is  $0.62 \pm 0.02$ , while the  $(F_0 - F)/F$  value of blank can be seen as zero due to  $F = F_0$ . Thus,  $Y_{\max/2}$  is estimated to be  $0.31 \pm 0.01$ , which indicates the half-maximal fluorescence image contrast change. According to equation (2), the calculated  $X$  is  $0.90 \pm 0.03$ , and thus the cocaine concentration is  $10^{0.90} = 7.97 \pm 0.57 \mu\text{M}$ . Due to  $K_d = [cocaine]$  is at which half-maximal fluorescence image contrast change occurs, the  $K_d$  is determined to be  $7.97 \pm 0.57 \mu\text{M}$ .

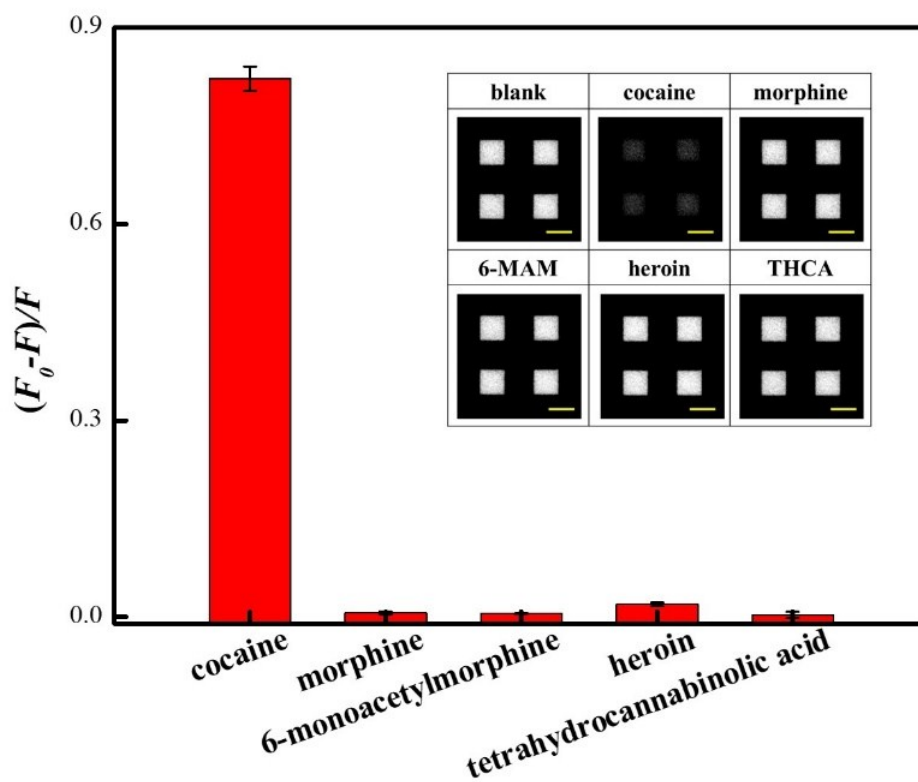

**Figure S4.** Selectivity examination of the CLL-fabricated aptamer-anchored platform toward cocaine. Each substrate was treated by 1 mM solutes. Each data point is obtained from the average fluorescence signal of individual squares ( $N = 4$ ). The error bars indicate the standard deviation. The scale bars are 20  $\mu\text{m}$ .

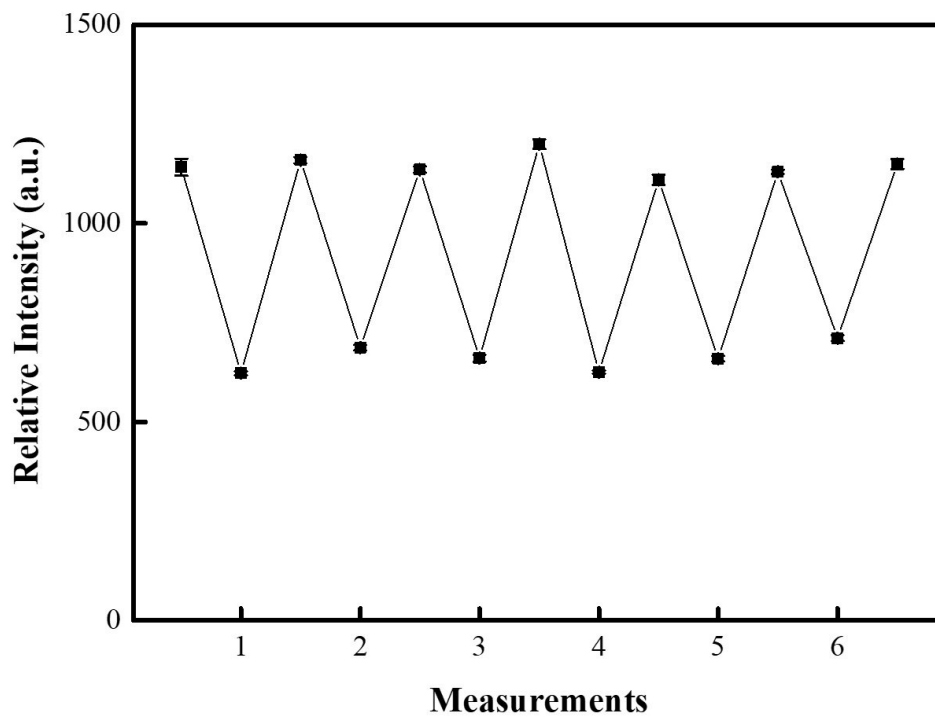

**Figure S5.** Reusability test of the CLL-fabricated aptamer-anchored platform for several measurement cycles of 100  $\mu\text{M}$  cocaine. Each data point is obtained from the average fluorescence signal of individual squares ( $N = 4$ ). The error bars indicate the standard deviation.

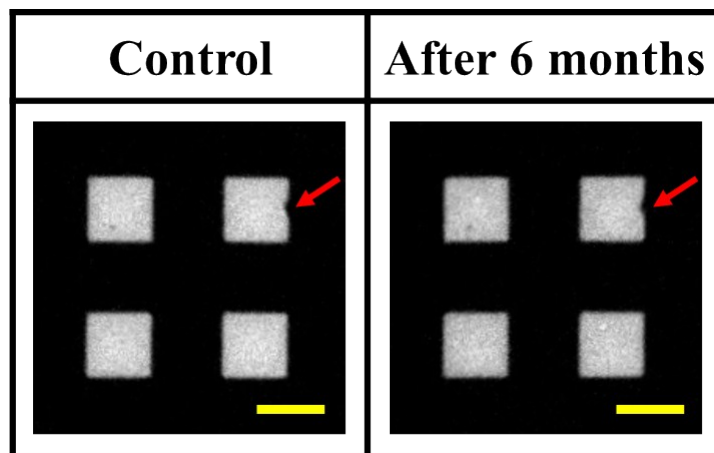

**Figure S6.** Comparison of the CLL-fabricated aptamer-anchored platform before and after 6-month of storage under 100% relative humidity at 4°C in dark. The selected pattern defect site (red arrows) indicates that the data were collected from the same sample. The scale bars are 20  $\mu\text{m}$ .



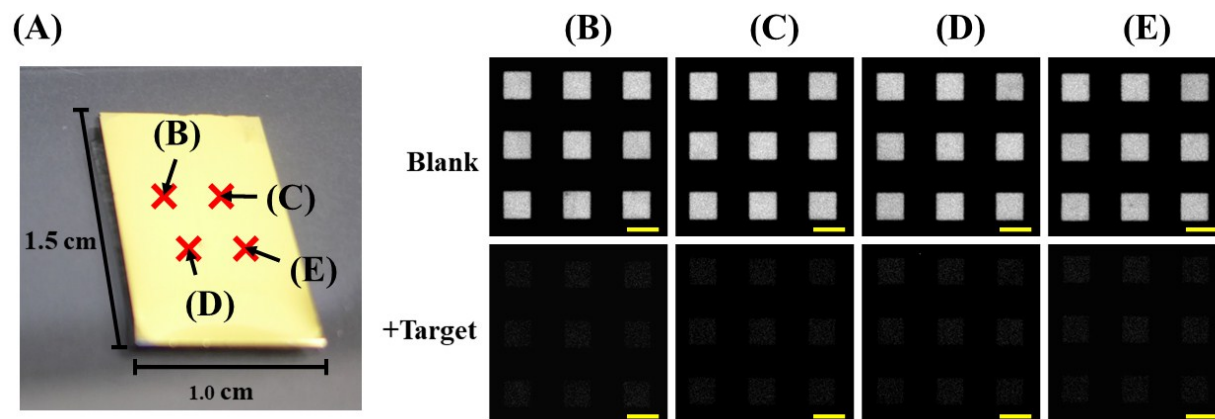

**Figure S7.** (A) Representing photo and (B-E) corresponding fluorescence images of different sampling spots obtained from the same CLL-fabricated aptamer-anchored substrate, and their responses toward the target. The scale bars are 20  $\mu\text{m}$ .

## REFERENCES

1. M. N. Stojanovic; P. de Prada; D. W. Landry, *J. Am. Chem. Soc.* **2001**, *123*, 4928-4931.
2. B. R. Baker; R. Y. Lai; M. S. Wood; E. H. Doctor; A. J. Heeger; K. W. Plaxco, *J. Am. Chem. Soc.* **2006**, *128*, 3138-3139.
3. R. J. White; N. Phares; A. A. Lubin; Y. Xiao; K. W. Plaxco, *Langmuir* **2008**, *24*, 10513-10518.
4. T. Zhao; R. Liu; X. Ding; J. Zhao; H. Yu; L. Wang; Q. Xu; X. Wang; X. Lou; M. He; Y. Xiao, *Anal. Chem.* **2015**, *87*, 7712-7719.
